# Supplementary material
Source: PubMed Central journal article supplement (PMC1326179)

A B C D

Queries:

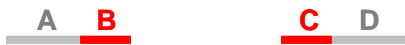

c.v. Nipponbare

CROSS\_MATCH  
BLASTN

*indica* c.v. 93-11  
WGS Database

Matches:

I

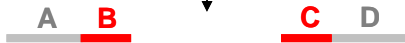

c.v. 93-11

II

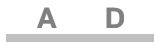

Supplement: pnas_0509810102_7.pdf [file pnas_0509810102_7.pdf]

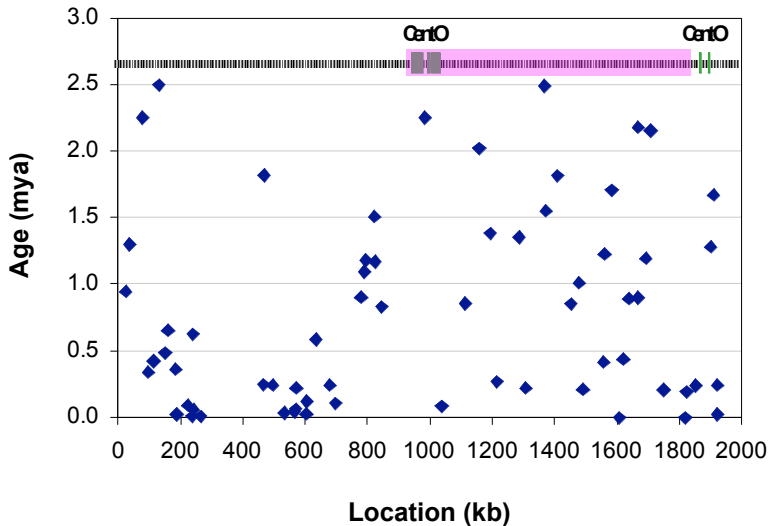

Supplement: pnas_0509810102_8.pdf [file pnas_0509810102_8.pdf]

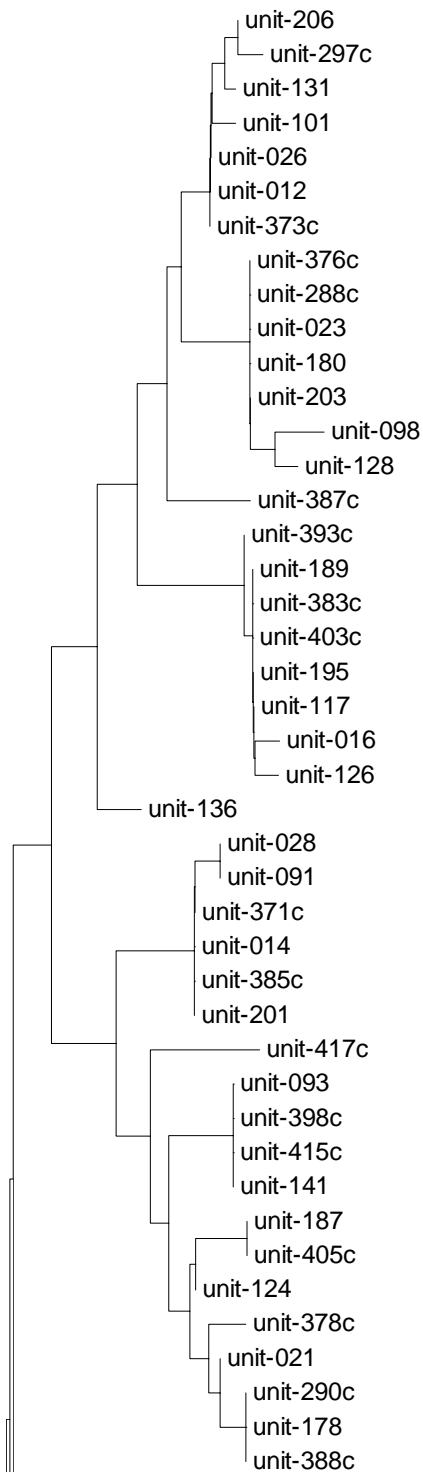

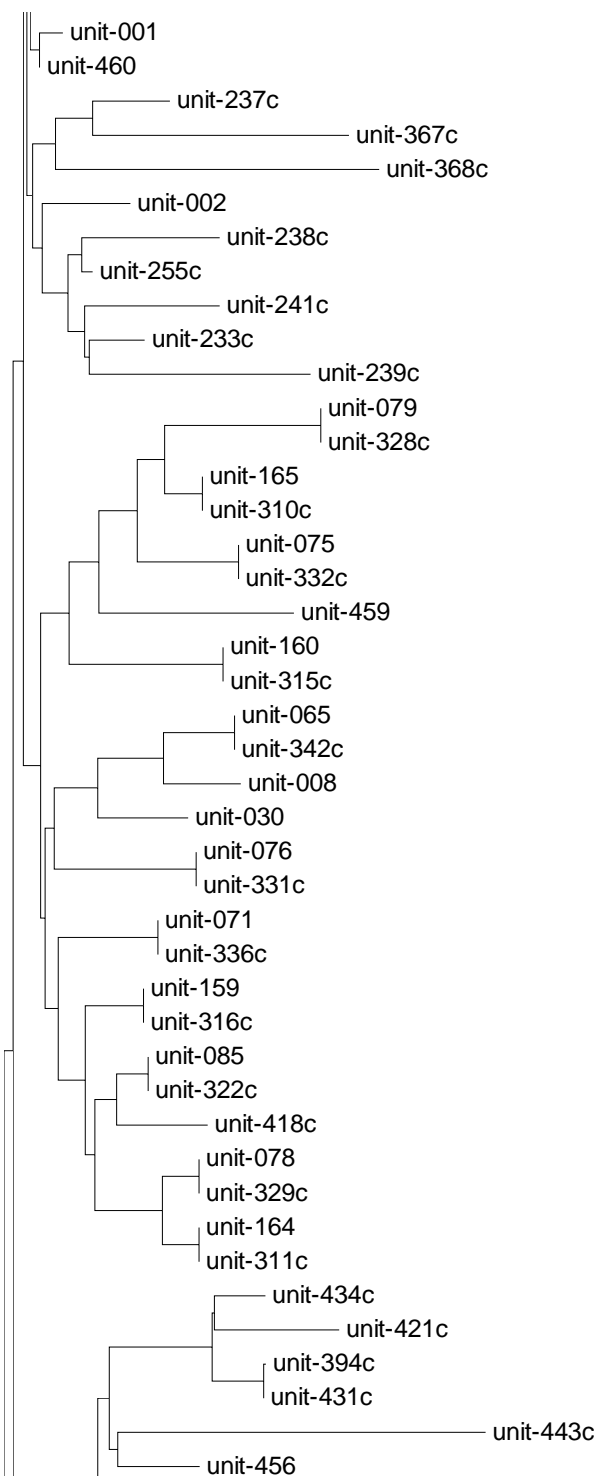

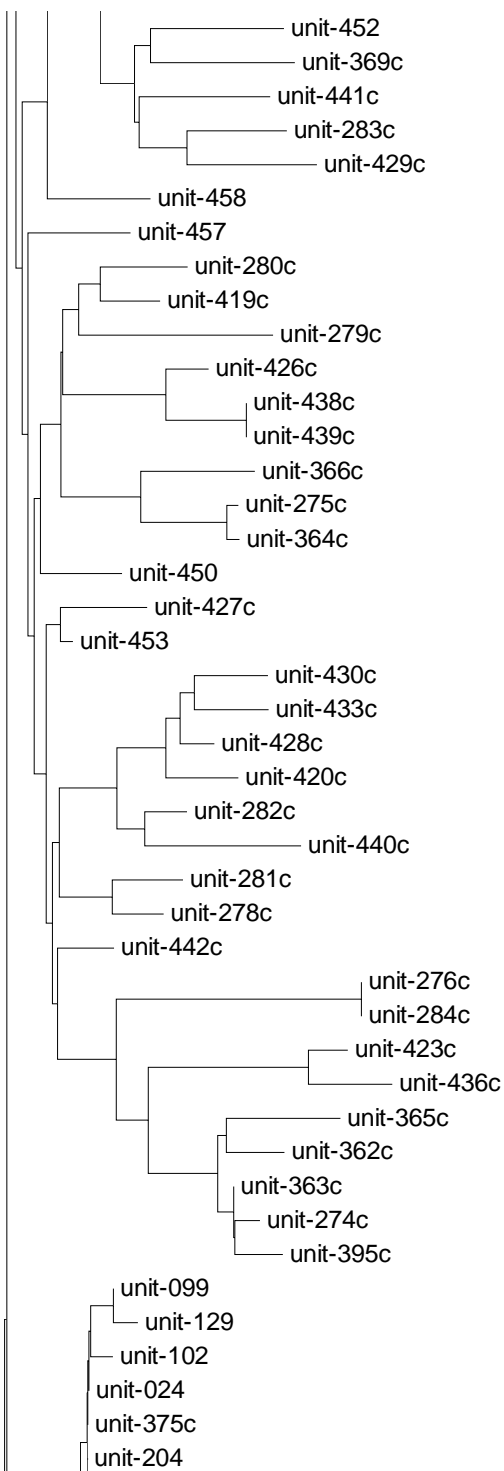

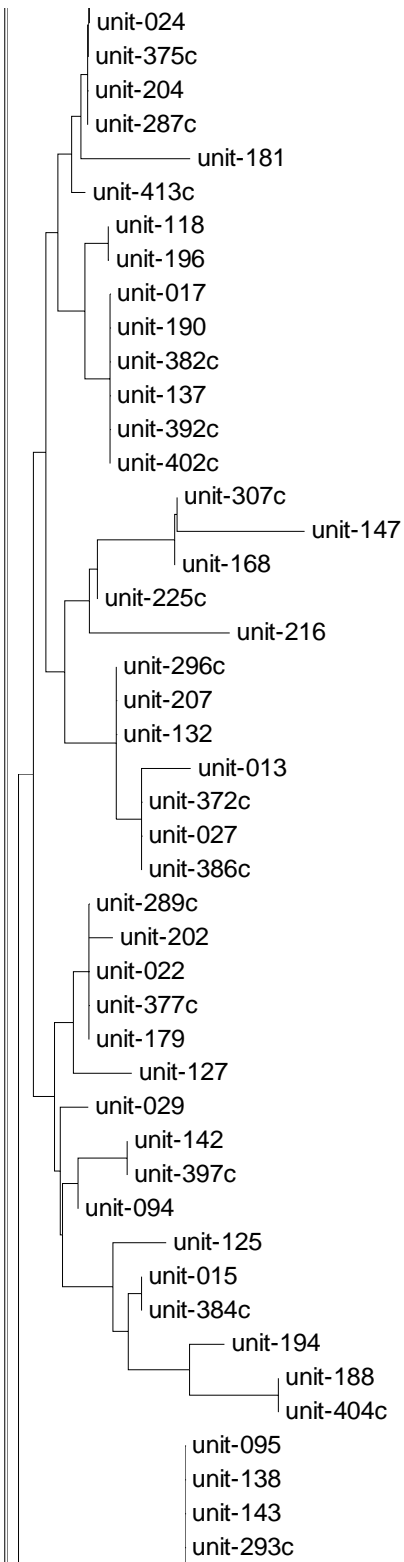

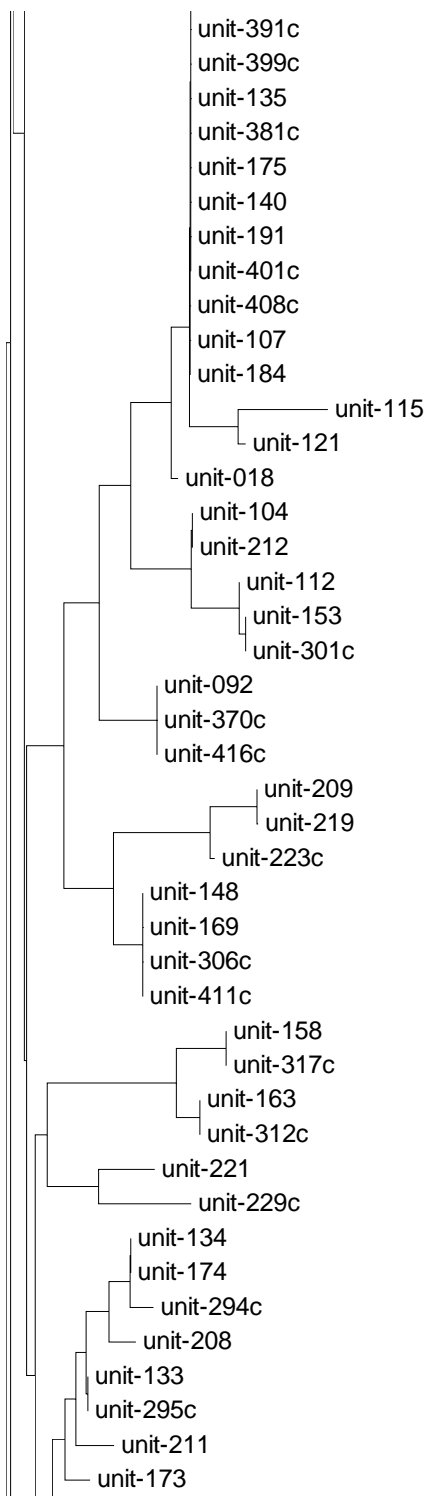

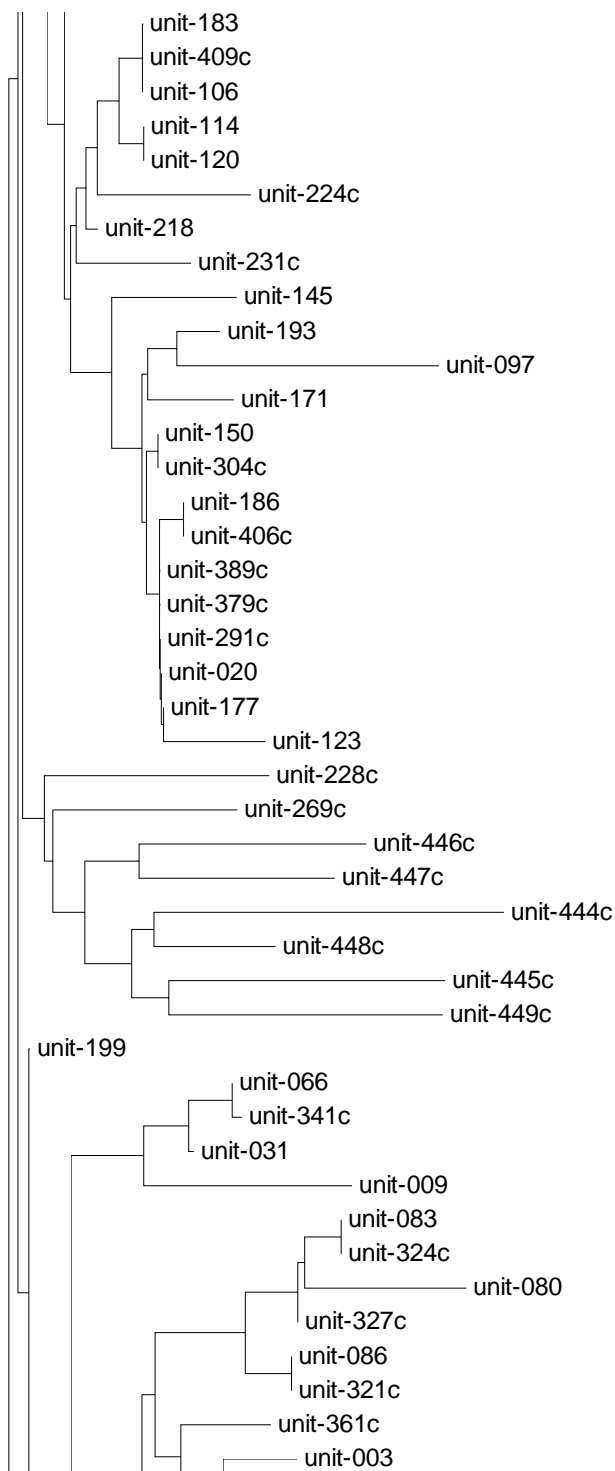

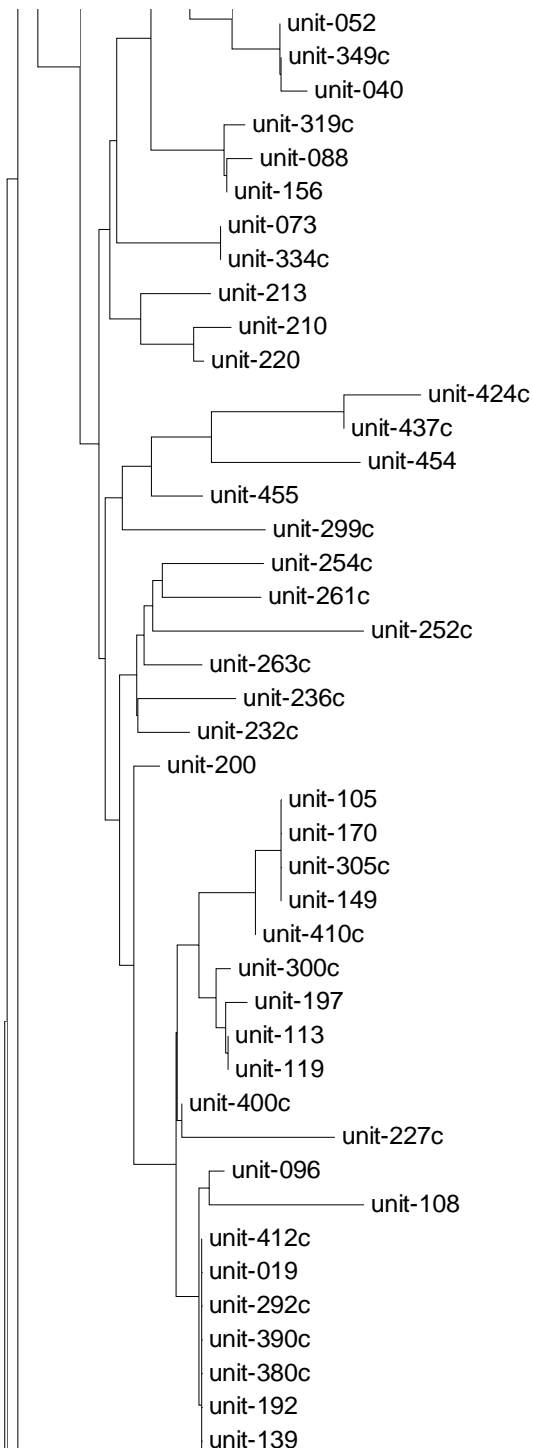

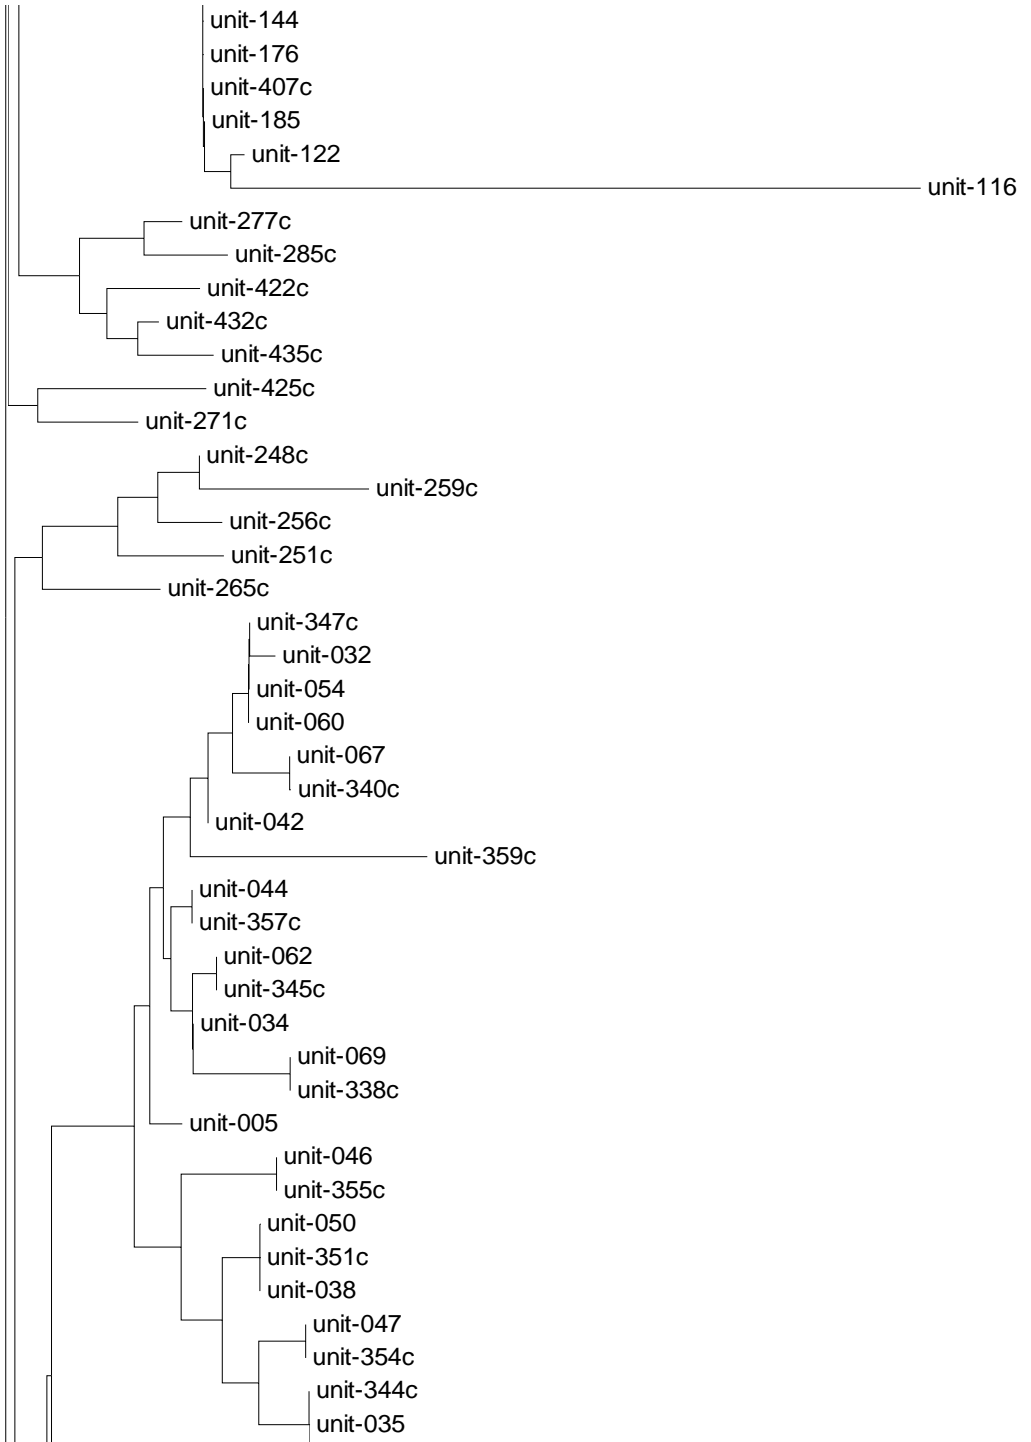



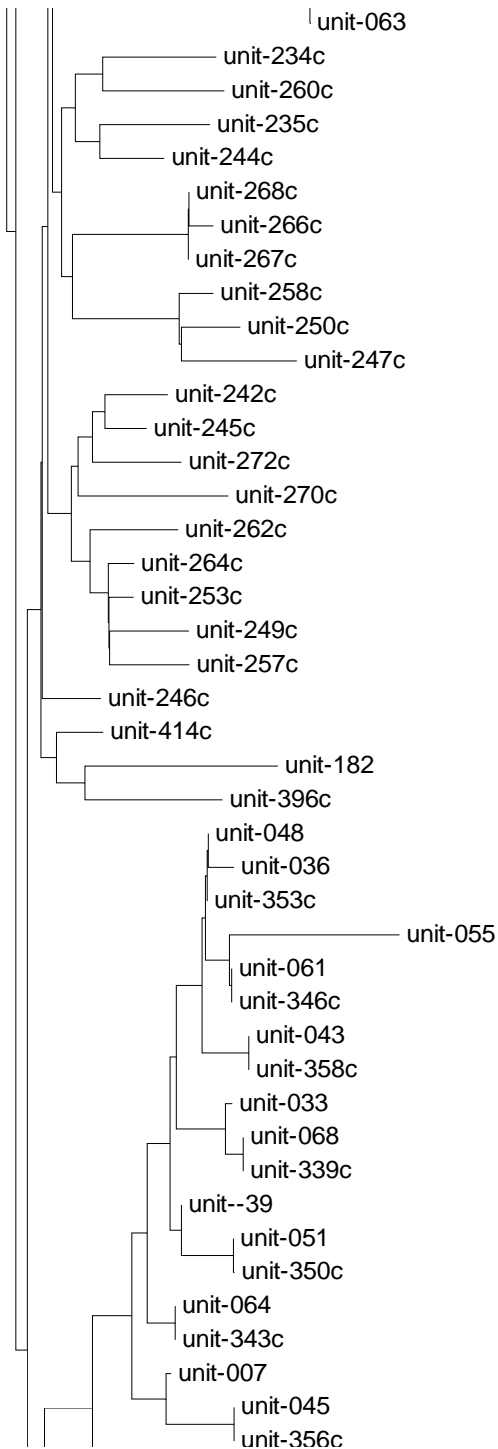

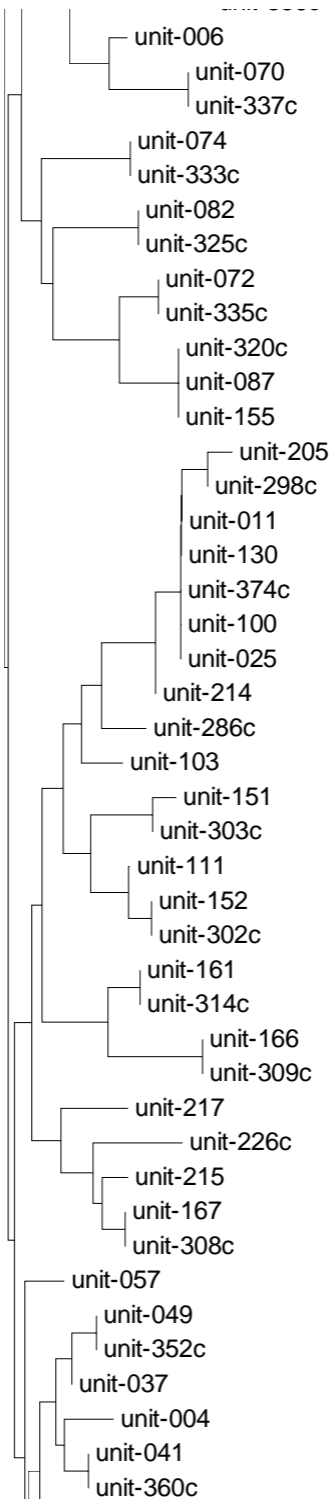

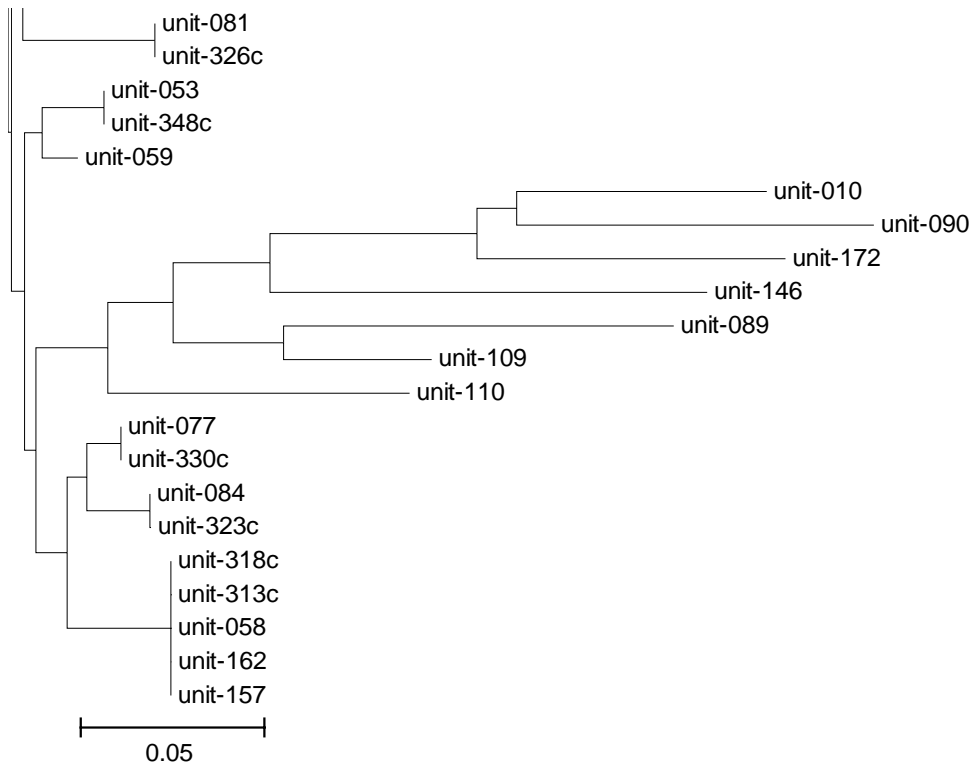

Supplement: pnas_0509810102_9.pdf [file pnas_0509810102_9.pdf]
